# Supplementary material
Source: Research Square preprint supplement (doi:10.21203/rs.3.rs-8834925/v1)
Supplement: Supplementary file 1 [file 53c1abb6e949e950d716dd21.pdf]

# Study of ethnoveterinary medicinal plants in Aseko District, Arsi Zone, southeastern Ethiopia

Authors

Jewar Safeno Jara<sup>1\*</sup>, Melesse Maryo<sup>2</sup>, Zerihun Girma<sup>3</sup>

Affiliations

<sup>1</sup>Department of General Forestry, Mizan Tepi University, P.O. Box 260, Mizan Aman, Ethiopia

<sup>2</sup>Ethiopian Biodiversity Institute; home-based at Ethiopian Civil Service University, Addis Ababa, Ethiopia

<sup>3</sup>Wondo Genet College of Forestry and Natural Resources, Hawassa University, Shashemene, Ethiopia

Corresponding author: Jewar Safeno Jara<sup>1\*</sup>

Email: jewar04@gmail.com; jewarsafeno@mtu.edu.et

ORCID: <https://orcid.org/0000-0001-9879-6315>

## Supplementary Table S1 | Complete ethnoveterinary use reports from Aseko District, southeastern Ethiopia

This dataset comprises **151 individual use reports** collected from **182 informants** across seven kebeles in Aseko District. It includes:

- Scientific name and family of each medicinal plant (66 species total)
- Local name in Afaan Oromoo
- Livestock ailment treated (33 ailments)
- Plant part(s) used
- Preparation method (e.g., crushing, decoction, pounding)
- Route of administration (oral, dermal, nasal, etc.)

All data were recorded during semi-structured interviews and guided field walks between July 2024 and February 2025. Voucher specimens were deposited at the Ethiopian Biodiversity Institute Herbarium (available upon request).

### Abbreviations:

PU: Plant parts used — Bark (Ba), Latex (La), Root (R), Leaf (L), Fruit (Fu), Flower (F), Seed (Se), Stem (St), Bulb (Bu), Rhizome (Rh), Twigs (Tw), Whole plant (Wp), Root+Leaf (RL), Leaf+Bark (LBa), Sap/Latex (Sa) RA: Route of administration — Oral (O), Nasal (N), Ocular (Op), Dermal (Dm), Auricular (Au) CO: Condition — Fresh (F), Dried (D), Fresh or dried (F/D) Ha: Growth habit — Herb (H), Shrub (Sh), Tree (T), Climber (Cl)

Ct: Collection source — Wild (W), Home garden (Hg)

| Voucher ID    | Scientific name                           | Family        | Local name       | PU | Disease treated   | Mode of preparation with dosage used                                                                                                                                   | RA     | CO  | Ha | Ct |
|---------------|-------------------------------------------|---------------|------------------|----|-------------------|------------------------------------------------------------------------------------------------------------------------------------------------------------------------|--------|-----|----|----|
| EBI-2024-0678 | Achyranthes aspera L.                     | Amaranthaceae | Darguu           | L  | Eye problem       | Direct application: fresh leaves chewed and the juice applied directly to the eye                                                                                      | Op     | F   | H  | W  |
| EBI-2024-0679 | Aeonium leucoblepharum Webb ex A. Richard | Crassulaceae  | Harmaa gurraatti | L  | Retained placenta | Pounding and drenching: fresh leaves pounded, mixed with cold water, and given orally using a local cup (Merti)                                                        | O      | F   | H  | W  |
| EBI-2024-0680 | Agave sisalana                            | Agavaceae     | Algee            | R  | Blackleg          | Crushing and drenching: fresh root crushed, mixed with water, and given orally to cattle                                                                               | O      | F   | H  | W  |
| EBI-2024-0681 | Aloe vera L.                              | Aloaceae      | Hargiisa         | L  | Bloating          | Pounding and drenching: leaves pounded with Ruta chalepensis, Allium sativum, and Foeniculum vulgare, mixed with water, and given orally using a large local container | O      | F   | H  | W  |
| EBI-2024-0682 | Allium sativum L.                         | Alliaceae     | Qullubii-Adii    | Bu | Pasteurellosis    | Pounding and drenching: bulbs pounded with roots of Brucea antidysenterica, Croton macrostachyus, and Premna resinosa, mixed with water, and poured onto infected area | Dm     | F   | H  | Hg |
|               |                                           |               |                  | Bu | Bloating          | Pounding and drenching: ten bulbs pounded and given orally twice daily for 3–5 days                                                                                    | O      | F   |    |    |
|               |                                           |               |                  | Bu | Blackleg          | Crushing and drenching: bulbs crushed, mixed with cold water, and poured onto infected part                                                                            | Dm     | F/D |    |    |
|               |                                           |               |                  | Bu | Dermatophilosis   | Direct application: bulbs ground and powder applied to affected skin                                                                                                   | Dm     | F/D |    |    |
|               |                                           |               |                  | Bu | Scabies           | Direct application: bulbs ground and powder applied to affected skin                                                                                                   | Dm     | F/D |    |    |
|               |                                           |               |                  | Bu | Ringworm          | Direct application: bulbs ground and powder applied to affected skin                                                                                                   | Dm     | F/D |    |    |
|               |                                           |               |                  | Bu | Parasitic leech   | Crushing and drenching: bulbs pounded, mixed with cold water, and given orally or poured onto affected area                                                            | O / Dm | F/D |    |    |

|               |                                  |               |             |    |                             |                                                                                                                                             |    |     |    |    |
|---------------|----------------------------------|---------------|-------------|----|-----------------------------|---------------------------------------------------------------------------------------------------------------------------------------------|----|-----|----|----|
|               |                                  |               |             | Bu | Lice infestation in chicken | Direct application: juice extracted and painted onto affected body parts                                                                    | Dm | F   |    |    |
| EBI-2024-0683 | Anethum graveolens L.            | Apiaceae      | Koomana     | R  | Retained feces              | Concoction: roots pounded, mixed with water, and the preparation drunk orally                                                               | O  | F   | H  | Hg |
| EBI-2024-0684 | Asparagus africanus Lam.         | Asparagaceae  | Sariitii    | L  | Placenta retention          | Crushing and drenching: leaves and roots pounded, mixed with cold water (without boiling), and given orally using a large local cup (Merti) | O  | F   | H  | W  |
|               |                                  |               |             | R  | Coccidiosis                 | Decoction: roots boiled, cooled, and the liquid given orally                                                                                | O  | F   |    |    |
|               |                                  |               |             | R  | Wound                       | Crushing, pasting, and tying: fresh roots pounded with leaves of Dodonaea angustifolia, mixed with butter, and applied to the wound         | Dm | F   |    |    |
| EBI-2024-0685 | Brassica nigra (L.) Koch         | Brassicaceae  | Siinaficiaa | Se | Bloating                    | Decoction: seeds boiled with salt, cooled, and drunk orally                                                                                 | O  | D   | H  | Hg |
|               |                                  |               |             | Se | Bloating                    | Concoction: seeds powdered and taken orally with water                                                                                      | O  | D   |    |    |
| EBI-2024-0686 | Brucea antidysenterica J.F.Mill. | Simaroubaceae | Jiloolaafaa | R  | Wound                       | Crushing, pasting, and tying: root crushed with fresh leaves of Dodonaea angustifolia and tied on the wound every other day for two days    | Dm | F/D | Sh | W  |
| EBI-2024-0687 | Calpurnia aurea (Ait.) Benth.    | Fabaceae      | Cekaa       | L  | Ectoparasites               | Direct application: crushed plant material washed and applied to affected areas                                                             | Dm | F   | Sh | W  |
|               |                                  |               |             | RL | Mechanical trauma           | Direct application: leaves and roots smashed and rubbed onto affected area                                                                  | Dm | F   |    |    |
|               |                                  |               |             | L  | Tick infestation            | Direct application: juice extracted and painted onto affected parts                                                                         | Dm | F   |    |    |
|               |                                  |               |             | L  | Helminthiasis               | Crushing and drenching: leaves pounded, mixed with cold water, and given orally                                                             | O  | F   |    |    |
|               |                                  |               |             | L  | Snake bite                  | Crushing and drenching: plant material crushed, mixed with water, and forcefully administered orally                                        | O  | F   |    |    |

|               |                                             |                |                |    |                       |                                                                                                                                                                   |       |     |    |    |
|---------------|---------------------------------------------|----------------|----------------|----|-----------------------|-------------------------------------------------------------------------------------------------------------------------------------------------------------------|-------|-----|----|----|
|               |                                             |                |                | R  | Snake bite            | Crushing and drenching: roots pounded, mixed with cold water, and given orally                                                                                    | O     | F   |    |    |
|               |                                             |                |                | L  | Sore                  | Direct application: plant parts ground and pasted onto affected skin                                                                                              | Dm    | F/D |    |    |
|               |                                             |                |                | Bu | Parasitic leech       | Crushing and drenching: plant material pounded, mixed with water, and given orally or poured onto affected area                                                   | N     | F/D |    |    |
| EBI-2024-0688 | <i>Capsicum annuum</i> L.                   | Solanaceae     | Barberee       | Fu | Bloat                 | Pounding and drenching: fruits pounded, mixed with water, and given orally                                                                                        | O     | D   | H  | Hg |
| EBI-2024-0689 | <i>Carissa spinarum</i> L.                  | Apocynaceae    | Hagama         | R  | Evil eye              | Direct application: root powdered, mixed with butter, and creamed onto affected body part                                                                         | Dm    | D   | Sh | W  |
|               |                                             |                |                | R  | Helminthiasis         | Crushing and drenching: juice extracted and given orally                                                                                                          | O     | F   |    |    |
| EBI-2024-0690 | <i>Capparis tomentosa</i> Lam.              | Capparidaceae  | Harangamaa     | R  | Breast swelling       | Crushing, pasting, and tying: fresh root pounded, mixed with butter, and applied to the swollen breast                                                            | Dm    | F/D | Sh | W  |
| EBI-2024-0691 | <i>Catha edulis</i> (Vahl) Forssk. ex Endl. | Celastraceae   | Jimaa          | L  | Urine retention       | Pounding and drenching: leaves pounded with <i>Ruta chalepensis</i> and <i>Foeniculum vulgare</i> , mixed with water and local areke (katikala), and given orally | O     | F   | Sh | Hg |
| EBI-2024-0692 | <i>Cissampelos mucronata</i> A. Rich.       | Menispermaceae | Bishaan qal'ee | L  | Respiratory infection | Crushing and drenching: leaves crushed with <i>Nicotiana tabacum</i> , mixed with honey, and administered orally or through nostrils                              | O / N | F   | Cl | W  |
| EBI-2024-0693 | <i>Clutia abyssinica</i> Jaub. & Spach      | Euphorbiaceae  | Ulee foonii    | L  | Bloody diarrhoea      | Crushing and drenching: leaves pounded, mixed with cold water, and given orally                                                                                   | O     | F   | Sh | Hg |
|               |                                             |                |                | R  | Nasal infection       | Crushing and drenching: roots pounded, mixed with cold water, and administered nasally                                                                            | N     | F   |    |    |
|               |                                             |                |                | R  | Mucous diarrhoea      | Crushing and drenching: roots pounded, mixed with cold water, and given orally                                                                                    | O     | F   |    |    |

|               |                             |                                                                                                  |                   |    |                       |                                                                                                                                                                                    |    |     |    |   |
|---------------|-----------------------------|--------------------------------------------------------------------------------------------------|-------------------|----|-----------------------|------------------------------------------------------------------------------------------------------------------------------------------------------------------------------------|----|-----|----|---|
| EBI-2024-0694 | Croton macrostachyus Del.   | Euphorbiaceae                                                                                    | Makanisaa         | L  | Bloat                 | Crushing and drenching: leaves pounded, mixed with cold water, and given orally                                                                                                    | O  | F   |    |   |
|               |                             |                                                                                                  |                   | L  | Ophthalmic infection  | Direct application: juice extracted and applied directly to the eye                                                                                                                | Op | F   |    |   |
|               |                             |                                                                                                  |                   | L  | Bloating              | Crushing and drenching: leaves crushed and administered nasally                                                                                                                    | N  | F   | T  | W |
|               |                             |                                                                                                  |                   | L  | Stomachache           | Crushing and drenching: sap squeezed and drunk orally                                                                                                                              | O  | F   |    |   |
|               |                             |                                                                                                  |                   | La | Wound                 | Direct application: harvested latex painted onto wound                                                                                                                             | Dm | F   |    |   |
|               |                             |                                                                                                  |                   | R  | Rabies                | Concoction: dried root powdered and mixed with injera, given to dogs                                                                                                               | O  | F/D |    |   |
|               |                             |                                                                                                  |                   | L  | Ringworm              | Direct application: juice extracted and painted onto affected area                                                                                                                 | Dm | F   |    |   |
|               |                             |                                                                                                  |                   | L  | Dermatophilosis       | Direct application: juice extracted and painted onto affected area                                                                                                                 | Dm | F   |    |   |
|               |                             |                                                                                                  |                   | L  | Minor bleeding        | Direct application: plant parts ground and pasted onto affected area                                                                                                               | Dm | F   |    |   |
|               |                             |                                                                                                  |                   | L  | Sore                  | Direct application: plant parts ground and pasted onto affected area                                                                                                               | Dm | F/D |    |   |
| EBI-2024-0695 | Cucumis ficifolius A. Rich. | Cucurbitaceae                                                                                    | Araddoo gurraatti | L  | Scabies               | Direct application: juice extracted and painted onto affected skin                                                                                                                 | Dm | F   |    |   |
|               |                             |                                                                                                  |                   | R  | Bloating and blackleg | Crushing and drenching: roots crushed with Vernonia amygdalina, Allium sativum, Ruta chalepensis, and leaves of Justicia schimperiana, mixed with water and given orally to cattle | O  | F   | Cl | W |
|               |                             |                                                                                                  |                   | R  | Pasteurellosis        | Pounding and drenching: roots pounded with Croton macrostachyus, Allium sativum, Premna schimperi, Brucea antidysenterica, and Maesa lanceolata, mixed with water and given orally | O  | F   |    |   |
| L             | Dislocated leg              | Direct application: fresh leaves mixed with butter, warmed on fire, and applied to affected part | Dm                | F  |                       |                                                                                                                                                                                    |    |     |    |   |

|               |                                      |                |                  |     |                        |                                                                                                                                                  |    |     |    |    |
|---------------|--------------------------------------|----------------|------------------|-----|------------------------|--------------------------------------------------------------------------------------------------------------------------------------------------|----|-----|----|----|
|               |                                      |                |                  | R   | Cattle infection       | Pounding and drenching: roots pounded with leaves of <i>Teclea nobilis</i> , mixed with cold water, and two glasses given orally to cattle       | O  | F/D |    |    |
| EBI-2024-0696 | <i>Cucurbita pepo</i> L.             | Cucurbitaceae  | Dubbaa / Dhobba  | R   | Bloat                  | Pounding and drenching: roots pounded with <i>Vernonia amygdalina</i> , mixed with local areke (katikala), and given orally or sprinkled on feed | O  | F   | H  | Hg |
|               |                                      |                |                  | LBa | Rabies                 | Concoction: leaves and bark pounded; ½ coffee cup given to humans and 1 cup to cattle                                                            | O  | F   |    |    |
| EBI-2024-0697 | <i>Cynodon dactylon</i> (L.) Pers.   | Poaceae        | Coqorsa          | Wp  | Snake bite             | Crushing, pasting, and tying: entire above-ground parts crushed, mixed with butter, and rubbed onto snake-bitten area                            | Dm | F   | H  | W  |
| EBI-2024-0698 | <i>Dodonaea angustifolia</i> L.f.    | Sapindaceae    | Iticha           | L   | Ear wound              | Crushing, pasting, and tying: leaves crushed with butter and placed on affected ear                                                              | Au | D   | Sh | W  |
|               |                                      |                |                  | Se  | Internal parasites     | Concoction: plant material ground, mixed with oat flour, baked, and fed to animals                                                               | O  | F/D |    |    |
|               |                                      |                |                  | L   | Wound                  | Direct application: fresh or dried leaves ground and applied after washing wound with squeezed leaves of <i>Calpurnia aurea</i>                  | Dm | F   |    |    |
| EBI-2024-0699 | <i>Discopodium eremanthum</i> Chiov. | Solanaceae     | Mararo           | L   | Abdominal distension   | Concoction: leaves crushed and chewed or drunk as liquid preparation                                                                             | O  | F   | Sh | W  |
|               |                                      |                |                  | L   | Retained placenta      | Decoction: fresh leaves pounded and the boiled liquid drunk                                                                                      | O  | F   |    |    |
|               |                                      |                |                  | L   | Blackleg               | Concoction: leaves crushed and the preparation drunk orally                                                                                      | O  | F/D |    |    |
|               |                                      |                |                  | L   | Breast pain            | Direct application: crushed leaves used as steam bath                                                                                            | Dm | F/D |    |    |
| EBI-2024-0700 | <i>Dovyalis abyssinica</i> A. Rich.  | Flacourtiaceae | Kooshimo         | L   | Retained placenta      | Decoction: leaves pounded and boiled; liquid drunk orally                                                                                        | O  | F   | Sh | W  |
| EBI-2024-0701 | <i>Embelia schimperi</i> Vatke       | Primulaceae    | Gurraa / Qorqoro | R   | Gastrointestinal worms | Decoction: dried roots pounded, boiled in water for 15 minutes; one coffee cup                                                                   | O  | D   | Sh | W  |

|               |                                                      |               |              |    |                               |                                                                                                                                 |    |     |    |    |
|---------------|------------------------------------------------------|---------------|--------------|----|-------------------------------|---------------------------------------------------------------------------------------------------------------------------------|----|-----|----|----|
|               |                                                      |               |              |    |                               | given orally to cattle twice daily for 3 days                                                                                   |    |     |    |    |
|               |                                                      |               |              | R  | Diarrhea                      | Same decoction administered once daily until symptoms subside                                                                   | O  | D   |    |    |
| EBI-2024-0702 | Erythrina brucei Schweinf.                           | Fabaceae      | Walleensu    | L  | Eye problem                   | Direct application: sap squeezed and applied directly to the eye                                                                | Op | F   | T  | W  |
|               |                                                      |               |              | L  | Cough                         | Concoction: crushed leaves mixed with food and given to hens                                                                    | O  | F   |    |    |
|               |                                                      |               |              | Ba | Wound                         | Direct application: powdered bark applied to wound                                                                              | Dm | D   |    |    |
| EBI-2024-0703 | Eucalyptus globulus Labill.                          | Myrtaceae     | Bargamo adii | L  | Cholera                       | Decoction: leaves pounded, boiled, liquid mixed with wheat flour and fed to hens                                                | O  | F   | T  | Hg |
| EBI-2024-0704 | Euphorbia abyssinica J.F. Gmel.                      | Euphorbiaceae | Adaami       | L  | Mule malaria                  | Direct application / smoke inhalation: fumigation using leaves                                                                  | N  | F   | T  | W  |
|               |                                                      |               |              | L  | Rinderpest                    | Direct application / smoke inhalation: fumigation of animal                                                                     | N  | F   |    |    |
|               |                                                      |               |              | Ba | Ascaris                       | Concoction: powdered bark of Croton macrostachyus mixed with food and taken orally                                              | O  | F   |    |    |
| EBI-2024-0705 | Hagenia abyssinica (Bruce) J.F. Gmel.                | Rosaceae      | Heexoo       | L  | Retained placenta             | Direct consumption: fresh leaves harvested and fed directly to cattle                                                           | O  | F   | T  | W  |
| EBI-2024-0706 | Heteromorpha arborescens (Spreng.) Cham. & Schltldl. | Apiaceae      | Aliyaanqaa   | R  | Eye disease                   | Direct application: fine root powder mixed with minimal water and applied to eye                                                | Op | F/D | Sh | W  |
| EBI-2024-0707 | Hordeum vulgare L.                                   | Poaceae       | Garbuu       | Se | Bloat                         | Concoction: seeds crushed with dry leaves of Melia azedarach and sprinkled on feed                                              | Dm | F/D | H  | Hg |
|               |                                                      |               |              | Se | Broken bones and worn tissues | Concoction: seeds lightly toasted, ground, prepared as soup for humans; grains fed daily to sick equines                        | O  | D   |    |    |
| EBI-2024-0708 | Hypericum revolutum Vahl                             | Hypericaceae  | Garambaa     | LR | Rabies                        | Pounding and drenching: roots and leaves pounded with Rumex nervosus, Phytolacca dodecandra, Brucea antidysenterica, and Croton | O  | F/D | Sh | W  |

|               |                                                    |              |                  |    |                                    |                                                                                                                                                                                         |    |     |    |    |
|---------------|----------------------------------------------------|--------------|------------------|----|------------------------------------|-----------------------------------------------------------------------------------------------------------------------------------------------------------------------------------------|----|-----|----|----|
| EBI-2024-0709 | Juniperus procera L.                               | Cupressaceae | Hindheessa       | R  | Retained placenta / fatal membrane | macrostachyus, mixed with water and given orally<br>Crushing and drenching: root pounded, mixed with cold water, and drunk or poured on animal                                          | O  | F   | T  | W  |
| EBI-2024-0710 | Justicia schimperiana (Hochst. ex Nees) T. Anders. | Acanthaceae  | Dhumugaa /Sensel | LR | Rabies                             | Crushing and drenching: plant pounded with cold water and given orally or poured on animal                                                                                              | O  | F   | Sh | W  |
|               |                                                    |              |                  | LR | Blackleg                           | Crushing and drenching: same preparation, administered orally                                                                                                                           | O  | F/D |    |    |
|               |                                                    |              |                  | L  | Intestinal parasites               | Crushing and drenching: same preparation, administered orally                                                                                                                           | O  | F/D |    |    |
| EBI-2024-0711 | Lepidium sativum L.                                | Brassicaceae | Fexo / Shuunfaa  | Se | Bloating                           | Pounding and drenching: seeds pounded with bulb of Allium sativum and given orally                                                                                                      | O  | D   | H  | Hg |
|               |                                                    |              |                  | Se | Febrile illness                    | Direct application / smoke inhalation: seeds placed on fire and smoke inhaled                                                                                                           | N  | D   |    |    |
| EBI-2024-0712 | Linum usitatissimum L.                             | Linaceae     | Talbaa           | Se | Retained placenta                  | Concoction: seed powder dissolved in water; half glass given orally                                                                                                                     | O  | D   | H  | Hg |
|               |                                                    |              |                  | Se | Constipation                       | Infusion: seeds soaked overnight and solution drunk                                                                                                                                     | O  | D   |    |    |
| EBI-2024-0713 | Maesa lanceolata Forssk.                           | Myrsinaceae  | Abbayyii         | L  | Ectoparasites                      | Direct application: plant material pounded and painted onto skin                                                                                                                        | Dm | F   | T  | W  |
|               |                                                    |              |                  | R  | Pasteurellosis (Gorosisu)          | Concoction: roots pounded with Allium sativum, Brucea antidysenterica, Croton macrostachyus, and Cucumis ficifolius, mixed with porcupine meat; 1 bottle for adult cattle, ½ for calves | O  | F/D |    |    |
|               |                                                    |              |                  | L  | Tick infestation                   | Direct application: juice extracted and painted on affected parts                                                                                                                       | Dm | F   |    |    |
|               |                                                    |              |                  | Fu | Dermatophilosis                    | Direct application: plant powder applied to skin                                                                                                                                        | Dm | F   |    |    |
|               |                                                    |              |                  | Fu | Helminthiasis                      | Crushing and drenching: plant pounded, mixed with water, and given orally                                                                                                               | O  | F   |    |    |
|               |                                                    |              |                  | Fu | Parasitic leech                    | Crushing and drenching: same preparation administered orally                                                                                                                            | O  | F   |    |    |

|               |                              |                |                  |       |                 |                                                                                                              |    |     |    |    |
|---------------|------------------------------|----------------|------------------|-------|-----------------|--------------------------------------------------------------------------------------------------------------|----|-----|----|----|
| EBI-2024-0714 | Melia azedarach L.           | Meliaceae      | Mim              | Ba    | Anthrax         | Concoction: dried bark powder mixed with water and drunk once                                                | O  | D   | T  | Hg |
| EBI-2024-0715 | Musa × paradisiaca L.        | Musaceae       | Muuzii           | Sa    | Wound           | Direct application: latex/sap applied directly with added salt                                               | Dm | F   | H  | Hg |
|               |                              |                |                  | Sa    | Snake bite      | Direct consumption: sap squeezed and drunk                                                                   | O  | F   |    |    |
| EBI-2024-0716 | Myrsine africana L.          | Myrsinaceae    | Qacama           | R     | Rabies          | Decoction: roots boiled and liquid drunk after cooling                                                       | O  | F   | Sh | W  |
| EBI-2024-0717 | Nigella sativa L.            | Ranunculaceae  | Habsuda guracha  | Se    | Blackleg        | Decoction: seeds powdered and the decoction drunk                                                            | O  | F/D | H  | Hg |
| EBI-2024-0718 | Nicotiana tabacum L.         | Solanaceae     | Timbaho / Tamboo | L     | Cough           | Crushing and drenching: sap squeezed and ½ litre given orally to cattle                                      | O  | F   | H  | Hg |
|               |                              |                |                  | L     | Leeches         | Crushing and drenching: sap squeezed and 1 coffee cup given orally                                           | O  | F   |    |    |
|               |                              |                |                  | LR    | Bloating        | Concoction: dried leaves and roots powdered, mixed with salt, and given orally                               | O  | D   |    |    |
|               |                              |                |                  | L     | Snake bite      | Crushing, pasting, and tying: leaves pounded and tied onto affected area                                     | Dm | F   |    |    |
| EBI-2024-0719 | Ocimum lamiifolium Hochst.   | Lamiaceae      | Damakasee        | L     | Diarrhea        | Infusion: leaves boiled briefly, cooled, and 1 glass given orally twice daily                                | O  | F   | H  | Hg |
|               |                              |                |                  | L     | Bloating        | Leaves crushed with Allium sativum, mixed with water, and given orally                                       | O  | F   |    |    |
| EBI-2024-0720 | Olinia rochetiana A. Juss.   | Oliniaceae     | Gunaa            | L     | Eczema          | Crushing, pasting, and tying: crushed leaves tied onto affected skin                                         | Dm | F   | T  | W  |
| EBI-2024-0721 | Phoenix reclinata Jacq.      | Arecaceae      | Meexxi           | L, St | Eye disease     | Direct application: leaves and stems chewed with Premna resinosa and spat into cattle's eye                  | Op | F   | T  | W  |
| EBI-2024-0722 | Phytolacca dodecandra L'Hér. | Phytolaccaceae | Handoodee        | Ba    | Rabies          | Concoction: dried root powdered, soaked overnight; ½ coffee cup for adults, ¼ for children, 1 cup for cattle | O  | D   | Cl | W  |
|               |                              |                |                  | LR    | Hyena bite      | Crushing, pasting, and tying: root and leaf smashed and tied on neck with clean cloth                        | N  | F   |    |    |
|               |                              |                |                  | L     | Parasitic leech | Crushing and drenching: plant pounded and administered orally                                                | O  | F   |    |    |

|               |                                    |                |         |    |                             |                                                                                                                                                                   |    |     |    |    |
|---------------|------------------------------------|----------------|---------|----|-----------------------------|-------------------------------------------------------------------------------------------------------------------------------------------------------------------|----|-----|----|----|
|               |                                    |                |         | R  | Mange                       | Crushing and drenching: same preparation administered orally                                                                                                      | O  | F   |    |    |
|               |                                    |                |         | R  | Helminthiasis               | Crushing and drenching: same preparation administered orally                                                                                                      | O  | F   |    |    |
|               |                                    |                |         | L  | Lice infestation in chicken | Crushing and drenching: preparation given orally or poured on animal                                                                                              | O  | F   |    |    |
|               |                                    |                |         | R  | Lumpy skin disease          | Crushing and drenching: preparation administered orally                                                                                                           | O  | F   |    |    |
| EBI-2024-0723 | Plantago lanceolata L.             | Plantaginaceae | —       | R  | Rabies                      | Crushing and drenching: plant pounded with cold water and given orally or poured on animal                                                                        | O  | F   | H  | Hg |
| EBI-2024-0724 | Podocarpus falcatus (Thunb.) Mirb. | Podocarpaceae  | Birbirs | Ba | Ringworm                    | Direct application: plant powder applied to affected skin                                                                                                         | Dm | F   | T  | W  |
|               |                                    |                |         | Ba | Mange                       | Direct application: plant powder applied to affected skin                                                                                                         | Dm | F   |    |    |
| EBI-2024-0725 | Plumbago zeylanica L.              | Plumbaginaceae | Merxes  | L  | Cough with mucus            | Concoction: leaf preparation drunk once daily for three mornings                                                                                                  | O  | D   | H  | W  |
|               |                                    |                |         | R  | Eye disease                 | Direct application: fine root powder mixed with drops of water and applied to eye                                                                                 | Op | D   |    |    |
| EBI-2024-0726 | Premna schimperii Engl.            | Lamiaceae      | Urgessa | L  | Eye disease                 | Direct application: leaves crushed with Ocimum forskolei, Vernonia amygdalina, Hagenia abyssinica, and Cynodon dactylon; drops applied to eye                     | Op | F   | T  | W  |
|               |                                    |                |         | R  | Pasteurellosis              | Concoction: roots pounded with Allium sativum, Brucea antidysenterica, and Cucumis ficifolius, mixed with porcupine meat; 1 bottle for adult cattle, ½ for calves | O  | F/D |    |    |
| EBI-2024-0727 | Rhamnus prinoides L'Hér.           | Rhamnaceae     | Geeshoo | L  | Leech                       | Crushing and drenching: fresh leaves pounded with Nicotiana tabacum and pepper, mixed with water and milk, and applied through the nostrils                       | N  | F   | Sh | Hg |
| EBI-2024-0728 | Ricinus communis L.                | Euphorbiaceae  | Qobboo  | R  | Stomachache                 | Concoction: root powdered and mixed with leaves of Momordica foetida; ½ L of the preparation given orally                                                         | O  | D   | Sh | Hg |

|               |                            |              |             |     |                           |                                                                                                                                             |    |     |    |    |
|---------------|----------------------------|--------------|-------------|-----|---------------------------|---------------------------------------------------------------------------------------------------------------------------------------------|----|-----|----|----|
|               |                            |              |             | R   | Blackleg                  | Crushing and drenching: root crushed and powdered, mixed with soap; ½ L given orally                                                        | O  | F   |    |    |
|               |                            |              |             | L   | Bloating                  | Direct application / smoke inhalation: leaves crushed with Croton macrostachyus and sniffed                                                 | N  | F   |    |    |
|               |                            |              |             | Fu  | Anthrax                   | Concoction: dried fruits powdered, mixed with water; one tea cup given orally to cattle                                                     | O  | D   |    |    |
|               |                            |              |             | R   | Sudden sickness           | Pounding and drenching: roots pounded with roots of Justicia schimperiana, mixed with cold water; 1–2 tea cups given orally                 | O  | F   |    |    |
|               |                            |              |             | R   | Actinomycosis (Kurufsisa) | Concoction: root pounded with table salt and soil; one glass given to cattle and half glass to goats and sheep                              | O  | F/D |    |    |
|               |                            |              |             | Fu  | Ulcerative lymphangitis   | Direct application: dried fruit powdered and mixed with bark powder of Prunus africana, creamed onto ulcerated skin of donkey               | Dm | D   |    |    |
|               |                            |              |             | Fu  | Epizootic lymphangitis    | Direct application: dried fruit powdered and mixed with bark powder of Prunus africana, creamed onto ulcerated skin of horse and mule       | Dm | D   |    |    |
|               |                            |              |             | L   | Swelling                  | Direct application: leaves warmed on fire and rubbed onto swollen area                                                                      | Dm | F   |    |    |
| EBI-2024-0729 | Rubus steudnerii Schweinf. | Rosaceae     | Dhukkoo     | L   | Diarrhea                  | Infusion: fresh leaves steeped in hot water for 10 minutes; liquid cooled and given orally (½ bottle for calves, 1 bottle for adult cattle) | O  | F   | Sh | W  |
| EBI-2024-0730 | Rumex nepalensis Spreng.   | Polygonaceae | Shaabbee    | R   | Internal parasites        | Infusion / Decoction: root chewed and swallowed, or boiled in water; one glass drunk once                                                   | O  | D   | H  | W  |
| EBI-2024-0731 | Ruta chalepensis L.        | Rutaceae     | Teenaadaama | LBa | Coccidiosis (Bilii)       | Pounding and drenching: bark and leaves pounded with root of Justicia schimperiana and given to hens with injera                            | O  | F   | H  | Hg |

|               |                                              |                |                 |    |                        |                                                                                                                                        |     |     |    |    |
|---------------|----------------------------------------------|----------------|-----------------|----|------------------------|----------------------------------------------------------------------------------------------------------------------------------------|-----|-----|----|----|
|               |                                              |                |                 | L  | Stomachache            | Pounding and drenching: fresh leaves pounded with garlic, mixed with one glass of milk and drunk                                       | O   | F   |    |    |
| EBI-2024-0732 | <i>Solanum anguivi</i> L.                    | Solanaceae     | Hidi-bude       | Se | Ticks                  | Direct application: crushed seeds applied directly to affected area                                                                    | Dm  | F   | H  | W  |
| EBI-2024-0733 | <i>Sorghum bicolor</i> (L.) Moench           | Poaceae        | Bisingaa caabbi | Se | Retained placenta      | Concoction: dry seeds mixed with salt and water and given orally to cattle                                                             | O   | D   | H  | Hg |
|               |                                              |                |                 | R  | Rabies                 | Concoction: dry root powdered, baked with teff flour, and given orally to cattle                                                       | O   | F   |    |    |
|               |                                              |                |                 | RL | Pasteurellosis         | Concoction: dry roots and leaves of <i>Stephania abyssinica</i> powdered, mixed with water, and given orally to animals                | O   | D   |    |    |
|               |                                              |                |                 | L  | Eye disease            | Direct application: leaves crushed with <i>Acacia abyssinica</i> and <i>Cynodon dactylon</i> ; drops applied to eye                    | Op  | F   |    |    |
| EBI-2024-0734 | <i>Syzygium guineense</i> var.               | Myrtaceae      | Baddessa        | Ba | Leech infection        | Direct application / smoke inhalation: inner stem bark chopped, prepared as solution, and half coffee cup administered through nostril | N   | F   | T  | W  |
| EBI-2024-0735 | <i>Teclea nobilis</i> Del.                   | Rutaceae       | Hadheesa        | L  | Trypanosomiasis (Trip) | Pounding and drenching: leaves pounded, mixed with water, and given orally to animals                                                  | O   | F   | Sh | W  |
|               |                                              |                |                 | R  | Wound                  | Direct application: root pounded, mixed with cold water, and applied to wound of donkey                                                | Dm  | F/D |    |    |
| EBI-2024-0736 | <i>Thymus schimperi</i> Ronniger             | Lamiaceae      | Xooshine        | L  | Gara Bokoysa           | Concoction: leaves crushed and chewed or drunk as preparation                                                                          | O   | D   | H  | W  |
| EBI-2024-0737 | <i>Tragia cinerea</i> (Pax)                  | Euphorbiaceae  | Laalessaa       | L  | Blackleg               | Crushing and drenching: leaves pounded, solution prepared; 1 L given orally and small amount through nostrils                          | O/N | F   | Cl | W  |
| EBI-2024-0738 | <i>Trichocladus ellipticus</i> Eckl. & Zeyh. | Hamamelidaceae | Dhadhaa         | L  | Eye disease            | Direct application: leaf sap extracted and 2-3 drops applied directly to the eye twice daily                                           | Op  | F   | Sh | W  |
| EBI-2024-0739 | <i>Urera hypselodendron</i> (A. Rich.) Wedd. | Urticaceae     | Haliilaa        | Wp | Urine retention        | Pounding and drenching: plant pounded, mixed with water, and given orally                                                              | O   | F   | Cl | W  |

|               |                               |                  |                  |    |                  |                                                                                                            |    |     |    |    |
|---------------|-------------------------------|------------------|------------------|----|------------------|------------------------------------------------------------------------------------------------------------|----|-----|----|----|
| EBI-2024-0740 | Verbascum sinaiticum Benth.   | Scrophulariaceae | Gurra Harree     | L  | Diarrhoea        | Concoction: leaf powder; 2–3 spoons with one bottle of water for cattle, one spoon with one cup for humans | O  | F/D | H  | W  |
| EBI-2024-0741 | Vernonia amygdalina Del.      | Asteraceae       | Ebicha           | L  | Diarrhoea        | Concoction: leaf powder mixed with salt and given orally to cattle                                         | O  | F   | Sh | W  |
|               |                               |                  |                  | L  | Wound            | Direct application: sap squeezed and painted on wound                                                      | Dm | F   |    |    |
| EBI-2024-0742 | Withania somnifera (L.) Dunal | Solanaceae       | Gizaawa / Uunjoo | R  | Blackleg         | Crushing and drenching: root pounded with cold water and given orally or poured on affected part           | O  | F/D | Sh | W  |
| EBI-2024-0743 | Zingiber officinale Roscoe    | Zingiberaceae    | Zinjibila        | Rh | Bloat            | Crushing and drenching: rhizome pounded with cold water and given orally or poured on animal               | O  | F   | H  | Hg |
| Voucher ID    |                               |                  |                  | Rh | Bloody diarrhoea | Crushing and drenching: same preparation administered orally                                               | O  | F   |    |    |
| EBI-2024-0678 |                               |                  |                  | Rh | Mucous diarrhoea | Crushing and drenching: same preparation administered orally                                               | O  | F   |    |    |
| EBI-2024-0679 |                               |                  |                  | Rh | Poor appetite    | Crushing and drenching: same preparation administered orally                                               | O  | F   |    |    |
